# Supplementary material for: Downregulation of Histone Methyltransferase Genes SUV39H1 and SUV39H2 Increases Telomere Length in Embryonic Stem-like Cells and Embryonic Fibroblasts in Pigs
Source: PubMed Central journal article supplement — J Reprod Dev. 2012 Sep 28;59(1):27–32. doi: 10.1262/jrd.2012-118 (PMC3943233; doi:10.1262/jrd.2012-118), 2012-09-28

**Supplementary Fig. 1.** Telomere length in *SUV39H1* and *SUV39H2* knockdown (SUV39KD) porcine embryonic stem like cells (pESLCs) and SUV39KD porcine embryonic fibroblasts (PEFs), after treated with siRNA for one passage, compared with controls. Telomere lengths were determined by using TeloTAGGG Telomere Length Assay kit. Telomere in SUV39KD pESLCs and SUV39KD PEFs had similar length compared with respective controls. Control DNA: DNA from immortal human cell lines provided in the kit; Control pESLCs: non-siRNA-treated pESLCs; Control PEFs: non-siRNA-treated PEFs.

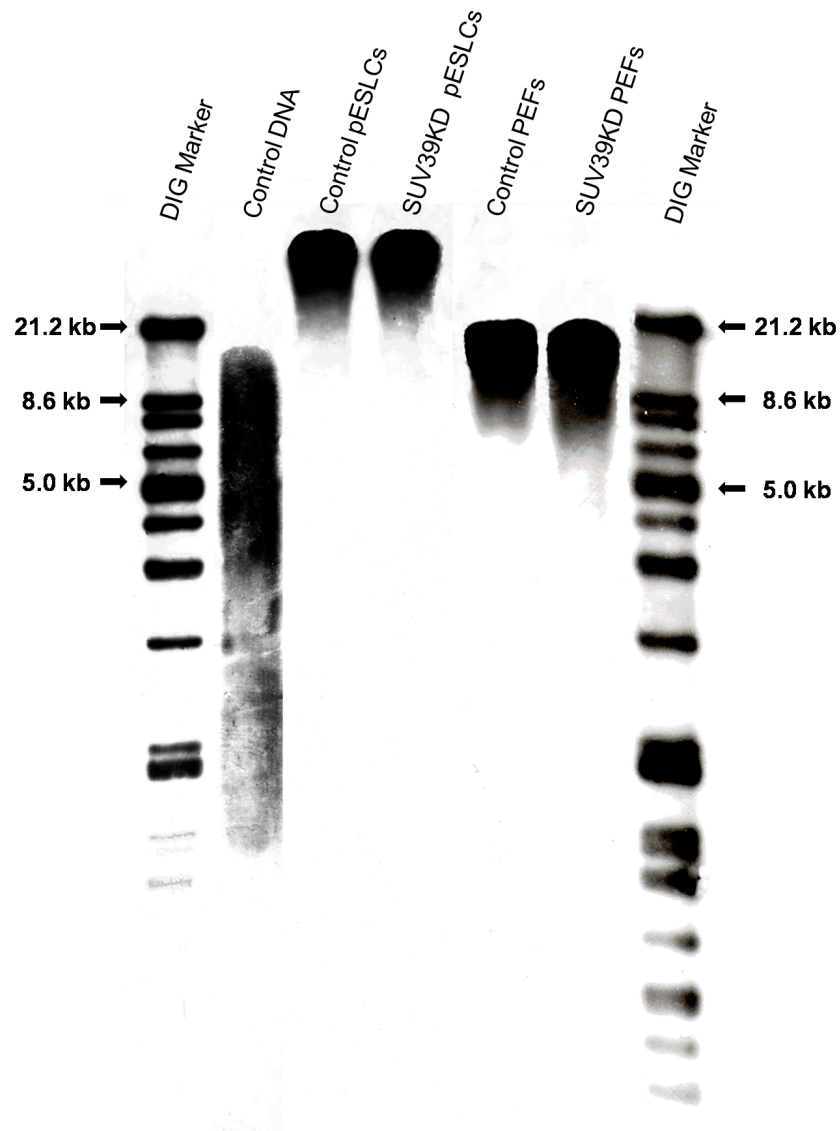

Supplement: jrd-59-027-s001.pdf [file jrd-59-027-s001.pdf]
